# Supplementary material for: Data on the effect of oral feeding of Arachidonic acid or Docosahexanoic acid on haematopoiesis in mice
Source: PubMed Central journal article supplement (PMC5568881; doi:10.1016/j.dib.2017.08.009), 2017-08-09
Supplement: mmc1.pdf [file mmc1.pdf]

CONFLICT OF INTEREST DECLARATION

Title of Paper: *Data on the effect of oral feeding of Arachidonic acid and Docosahexaenoic acid on haematopoiesis in mice*

Please tick one of the following boxes:

We have no conflict of interest to declare.

We have a competing interest to declare (please fill in box below):

This statement is to certify that all Authors have seen and approved the manuscript being submitted. We warrant that the article is the Authors' original work. We warrant that the article has not received prior publication and is not under consideration for publication elsewhere. On behalf of all Co-Authors, the corresponding Author shall bear full responsibility for the submission. This research has not been submitted for publication nor has it been published in whole or in part elsewhere. We attest to the fact that all Authors listed on the title page have contributed significantly to the work, have read the manuscript, attest to the validity and legitimacy of the data and its interpretation, and agree to its submission to 'Data in Brief' Journal. All authors agree that author list is correct in its content and order and that no modification to the author list can be made without the written acceptance of all authors and the formal approval of the Editor-in-Chief. All authors accept that the Editor-in-Chief's decisions over acceptance or rejection or in the event of any breach of the Principles of Ethical Publishing in 'Data in Brief' Journal being discovered, of retraction are final.

Author Signature

Name

*L. Limaye*

*Dr. (Mrs.) L. S. Limaye*

Please check this box if you are submitting this on behalf of all authors.
